# Supplementary material for: Safety and Efficacy of Leadless Pacemakers: A Systematic Review and Meta‐Analysis
Source: PubMed Central journal article supplement — J Am Heart Assoc. 2021 Jun 25;10(13):e019212. doi: 10.1161/JAHA.120.019212 (PMC8403316; doi:10.1161/jaha.120.019212), 2021-06-25
Supplement: JAH3-10-e019212-s001.pdf [file JAH3-10-e019212-s001.pdf]

# **SUPPLEMENTAL MATERIAL**

**Table S1. Search strategy and keywords.**

| <b>DATABASE</b> | <b>SEARCH KEYWORDS</b>                                                                             |
|-----------------|----------------------------------------------------------------------------------------------------|
| Pubmed          | (Micra[tiab] OR Nanostim[tiab] OR Leadless[tiab]) AND (pacemaker*[tiab] OR pacemaker[mh])          |
| Embase          | ('micra':ti,ab OR 'nanostim':ti,ab OR 'leadless':ti,ab) AND ('pacemaker'/exp OR 'pacemaker':ti,ab) |

**Table S2. Studies included for meta-analysis of proportion of patients with a successful implant.**

| Author (year)                       | Study design                                         | Study population                                                                | Device   | Number of patients with implant attempt(s) | Number of patients with successful implant |
|-------------------------------------|------------------------------------------------------|---------------------------------------------------------------------------------|----------|--------------------------------------------|--------------------------------------------|
| Reddy (2014) <sup>8</sup>           | Prospective, single-arm, multi-center cohort study   | Consecutive patients undergoing LP implantations                                | Nanostim | 33                                         | 32                                         |
| Reddy (2015) <sup>9</sup>           | Prospective, single-arm, multi-center cohort study   | Consecutive patients undergoing LP implantations                                | Nanostim | 300                                        | 289                                        |
| Sperzel (2018) <sup>36</sup>        | Prospective, single-arm, multi-center cohort study   | Consecutive patients undergoing LP implantations                                | Nanostim | 467                                        | 451                                        |
| Vaidya (2019) <sup>44</sup>         | Retrospective, two-arm, single-center cohort study   | Consecutive patients undergoing LP implantations                                | Nanostim | 17                                         | 17                                         |
| Reynolds (2016) <sup>11</sup>       | Prospective, single-arm, multi-center cohort study   | Consecutive patients undergoing LP implantations                                | Micra    | 725                                        | 719                                        |
| Pachon (2016) <sup>33</sup>         | Single-arm, single-center cohort study               | Consecutive patients undergoing LP implantations                                | Micra    | 10                                         | 10                                         |
| Martinez-Sande (2017) <sup>35</sup> | Prospective, single-arm, single-center cohort study  | Consecutive patients undergoing LP implantations                                | Micra    | 30                                         | 30                                         |
| Da Costa (2016) <sup>34</sup>       | Prospective, single-arm, single-center cohort study  | Consecutive patients with full or relative contraindications of traditional TVP | Micra    | 14                                         | 14                                         |
| Bongiorni (2018) <sup>37</sup>      | Prospective, single-arm, single-center cohort study  | Consecutive patients undergoing LP implantations                                | Micra    | 52                                         | 52                                         |
| El-Chami (2018) <sup>20</sup>       | Prospective, single-arm, multi-center cohort study   | Consecutive patients implanted with Micra devices after approval                | Micra    | 1817                                       | 1801                                       |
| Demant (2019) <sup>38</sup>         | Prospective, single-arm, single-center cohort study  | Consecutive patients undergoing LP implantations                                | Micra    | 79                                         | 76                                         |
| Kaczmarek (2019) <sup>41</sup>      | Prospective, single-arm, single-center cohort study  | Consecutive patients undergoing LP implantations                                | Micra    | 24                                         | 24                                         |
| Roberts (2019) <sup>43</sup>        | Retrospective, single-arm, multi-center cohort study | Patients implanted with Micra LP for cardioinhibitory vasovagal syncope         | Micra    | 32                                         | 32                                         |
| Vaidya (2019) <sup>44</sup>         | Retrospective, two-arm, single-center cohort study   | Consecutive patients undergoing LP implantations                                | Micra    | 73                                         | 73                                         |
| Valiton (2019) <sup>45</sup>        | Retrospective, single-arm, multi-center cohort study | Consecutive patients undergoing LP implantations                                | Micra    | 92                                         | 90                                         |
| Garweg (2019) <sup>39</sup>         | Prospective, single-arm, single-center cohort study  | Patients implanted with Micra LP for cardioinhibitory vasovagal syncope         | Micra    | 133                                        | 133                                        |
| Hai (2019) <sup>40</sup>            | Prospective, single-arm, single-center cohort study  | Consecutive patients undergoing LP implantations                                | Micra    | 51                                         | 51                                         |
| Turagam (2020) <sup>53</sup>        | Retrospective, two-arm, multi-center cohort study    | Patients with cardio inhibitory vasovagal syncope implanted with LP.            | Micra    | 24                                         | 24                                         |
| Tachibana (2020) <sup>51</sup>      | Retrospective, two-arm, single-center cohort study   | Consecutive patients ≥85 years underwent LP implantation                        | Micra    | 27                                         | 27                                         |
| Haerberlin (2020) <sup>48</sup>     | Prospective, single-arm, two-center cohort study     | Consecutive patients undergoing LP implantations                                | Micra    | 111                                        | 106                                        |
| Grabowski (2020) <sup>47</sup>      | Prospective, single-arm, single-center cohort study  | Consecutive patients undergoing LP implantations                                | Micra    | 10                                         | 10                                         |
| El Amrani (20120) <sup>46</sup>     | Prospective, single-arm, single-center cohort study  | Consecutive patients >70 years with an attempted LP implant                     | Micra    | 129                                        | 127                                        |
| Pagan (2020) <sup>50</sup>          | Retrospective, two-arm, multi-center cohort study    | Patients ≥85 years implanted with a Micra                                       | Micra    | 183                                        | 180                                        |
| Tolosana (2020) <sup>52</sup>       | Single-arm, single-center v                          | Consecutive patients undergoing LP implantations                                | Micra    | 110                                        | 108                                        |

LP=leadless pacemaker

**Table S3. Study quality assessment results.**

| <b>Author (Year)</b>                | <b>1</b> | <b>2</b> | <b>3</b> | <b>4</b> | <b>5</b> | <b>6</b> | <b>7</b> | <b>8</b> | <b>9</b> | <b>10</b> | <b>11</b> | <b>12</b> | <b>13</b> | <b>14</b> | <b>Quality</b> |
|-------------------------------------|----------|----------|----------|----------|----------|----------|----------|----------|----------|-----------|-----------|-----------|-----------|-----------|----------------|
| Reddy (2014) <sup>8</sup>           | Y        | Y        | Y        | Y        | Y        | Y        | Y        | Y        | Y        |           |           |           |           |           | GOOD           |
| Knops (2015) <sup>19</sup>          | Y        | Y        | Y        | Y        | Y        | Y        | Y        | Y        | Y        |           |           |           |           |           | GOOD           |
| Reddy (2015) <sup>9</sup>           | Y        | Y        | Y        | Y        | Y        | Y        | Y        | Y        | Y        |           |           |           |           |           | GOOD           |
| Ritter (2015) <sup>10</sup>         | Y        | Y        | Y        | Y        | Y        | Y        | Y        | Y        | Y        |           |           |           |           |           | GOOD           |
| Pachon (2016) <sup>33</sup>         | Y        | Y        | Y        | Y        | Y        | Y        | Y        | Y        | Y        |           |           |           |           |           | GOOD           |
| Reynolds (2016) <sup>11</sup>       | Y        | Y        | Y        | Y        | Y        | Y        | Y        | Y        | Y        |           |           |           |           |           | GOOD           |
| Da Costa (2017) <sup>34</sup>       | Y        | Y        | Y        | Y        | Y        | Y        | Y        | Y        | Y        |           |           |           |           |           | GOOD           |
| Duray (2017) <sup>27</sup>          | Y        | Y        | NA       | Y        | NA       | NA       | NA       | NA       | Y        | NA        | N         | N         | Y         | NA        | FAIR           |
| Martinez-Sande (2017) <sup>35</sup> | Y        | Y        | Y        | Y        | Y        | Y        | Y        | Y        | N        |           |           |           |           |           | FAIR           |
| Roberts (2017) <sup>28</sup>        | Y        | Y        | Y        | Y        | Y        | Y        | N        | Y        | N        |           |           |           |           |           | FAIR           |
| Cantillon (2018) <sup>29</sup>      | Y        | Y        | Y        | Y        | Y        | Y        | N        | Y        | Y        |           |           |           |           |           | FAIR           |
| El-Chami (2018) <sup>20</sup>       | Y        | Y        | Y        | Y        | Y        | Y        | Y        | Y        | Y        |           |           |           |           |           | GOOD           |
| Sperzel (2018) <sup>36</sup>        | Y        | Y        | Y        | Y        | Y        | Y        | Y        | Y        | Y        |           |           |           |           |           | GOOD           |
| Tjong (2018) <sup>30</sup>          | Y        | Y        | NA       | N        | NA       | NA       | NA       | NA       | Y        | NA        | Y         | N         | Y         | NA        | FAIR           |
| Bongiorni (2018) <sup>37</sup>      | Y        | Y        | Y        | Y        | Y        | Y        | Y        | Y        | Y        |           |           |           |           |           | GOOD           |
| Denman (2019) <sup>38</sup>         | Y        | Y        | Y        | Y        | Y        | Y        | Y        | Y        | Y        |           |           |           |           |           | GOOD           |
| Garweg (2019) <sup>39</sup>         | Y        | Y        | Y        | Y        | Y        | Y        | Y        | Y        | N        |           |           |           |           |           | FAIR           |
| Hai (2019) <sup>40</sup>            | Y        | Y        | Y        | Y        | Y        | Y        | Y        | Y        | Y        |           |           |           |           |           | GOOD           |
| Kaczmarek (2019) <sup>41</sup>      | Y        | Y        | Y        | Y        | Y        | N        | Y        | Y        | N        |           |           |           |           |           | FAIR           |
| Kiani (2019) <sup>31</sup>          | Y        | Y        | Y        | Y        | Y        | Y        | Y        | Y        | Y        |           |           |           |           |           | GOOD           |

|                                      |   |   |    |   |    |    |    |    |   |    |   |   |   |    |  |      |
|--------------------------------------|---|---|----|---|----|----|----|----|---|----|---|---|---|----|--|------|
| Kiani (2019) <sup>42</sup>           | Y | Y | Y  | Y | Y  | Y  | Y  | Y  | Y |    |   |   |   |    |  | GOOD |
| Roberts (2019) <sup>43</sup>         | Y | Y | N  | Y | Y  | Y  | Y  | Y  | Y |    |   |   |   |    |  | FAIR |
| Vaidya (2019) <sup>44</sup>          | Y | Y | NA | N | NA | NA | NA | NA | Y | NA | Y | N | Y | NA |  | FAIR |
| Valiton (2019) <sup>45</sup>         | Y | Y | Y  | Y | Y  | Y  | Y  | Y  | Y |    |   |   |   |    |  | GOOD |
| El Amrani (2020) <sup>46</sup>       | Y | Y | Y  | Y | Y  | Y  | Y  | Y  | Y |    |   |   |   |    |  | GOOD |
| Grabowski (2020) <sup>47</sup>       | Y | Y | Y  | Y | Y  | N  | N  | Y  | N |    |   |   |   |    |  | POOR |
| Haeberlin (2020) <sup>48</sup>       | Y | Y | Y  | Y | Y  | Y  | N  | Y  | N |    |   |   |   |    |  | FAIR |
| Mohammed (2020) <sup>49</sup>        | Y | Y | Y  | Y | Y  | N  | N  | Y  | Y |    |   |   |   |    |  | FAIR |
| Pagan (2020) <sup>50</sup>           | Y | Y | Y  | Y | Y  | Y  | N  | Y  | Y |    |   |   |   |    |  | FAIR |
| Tachibana (2020) <sup>51</sup>       | Y | Y | NA | Y | NA | NA | NA | NA | Y | NA | N | N | Y | NA |  | FAIR |
| Tolosana (2020) <sup>52</sup>        | Y | Y | Y  | Y | Y  | Y  | Y  | Y  | Y |    |   |   |   |    |  | GOOD |
| Turagam (2020) <sup>53</sup>         | Y | Y | Y  | Y | Y  | Y  | Y  | Y  | Y |    |   |   |   |    |  | GOOD |
| Salaun (2018) <sup>26</sup>          | Y | Y | Y  | Y | Y  | Y  | N  | Y  | Y |    |   |   |   |    |  | FAIR |
| Tjong (2018) <sup>32</sup>           | Y | Y | NA | N | NA | NA | NA | NA | Y | NA | Y | N | Y | Y  |  | FAIR |
| Beurskens (2019) <sup>25</sup>       | Y | Y | NA | Y | NA | NA | NA | NA | Y | NA | Y | N | Y | Y  |  | GOOD |
| Cabanas-Grandio (2019) <sup>24</sup> | Y | Y | NA | Y | NA | NA | NA | NA | Y | NA | Y | N | Y | Y  |  | GOOD |

NA=Not applicable, N=No, Y=Yes.
